# Supplementary material
Source: publisher site journal article supplement (https://www.spandidos-publications.com/6080/downloadSupplementary)
Supplement: Supplementary file 1 [file downloadSupplementary]

Table SI. Regular diet for the CTRL group.

| Component    | %  |
|--------------|----|
| Fat          | 12 |
| Carbohydrate | 64 |
| Protein      | 24 |

The feed is made into granular solid.

Table SII. Components of high fat feed.

| Component    | %  |
|--------------|----|
| Fat          | 45 |
| Carbohydrate | 35 |
| Protein      | 20 |

The feed is made into granular solid.
